# Supplementary material for: Dataset on assessment of River Yamuna, Delhi, India using indexing approach
Source: PubMed Central journal article supplement (PMC6293046; doi:10.1016/j.dib.2018.11.130), 2018-11-29
Supplement: mmc1.pdf [file mmc1.pdf]

## Conflict of Interest

*The authors have declared no conflict of interest*

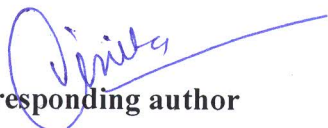

**Corresponding author**

Name: Dr. Vinita Khandegar (Assistant Professor)

Affiliation: University School of Chemical Technology

Guru Gobind Singh Indraprastha University, Dwarka New Delhi-110078, India
